# Supplementary material for: TCP-based window-size delegation method for TXOP Exchange in wireless local area networks
Source: Springer Nature journal article supplement (doi:10.1186/1687-1499-2011-58), 2011-08-11

■: TXOP

### Conventional CSMA/CA (uniform allocation)

### Proposed

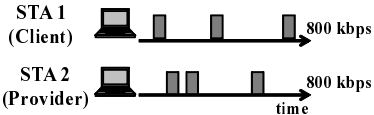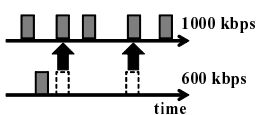

Supplement: 13638_2011_58_MOESM1_ESM.pdf [file 13638_2011_58_MOESM1_ESM.pdf]
